# Supplementary material for: Hemispherotomy in Infants with Hemimegalencephaly: Long-Term Seizure and Developmental Outcome in Early Treated Patients
Source: MDPI journal article supplement (doi:10.3390/brainsci13010073), 2022-12-30
Supplement: s1 [file s1]

| <b>GMDS</b>                         | <b>DQ</b> | <b>DA</b>   |
|-------------------------------------|-----------|-------------|
| General                             | 62        | 10 months   |
| Locomotor Area                      | 78        | 12,5 months |
| Personal and Social Area            | 65        | 10,5 months |
| Language Area                       | 62        | 10 months   |
| Manual and Visual Coordination Area | 59        | 9,5 months  |
| Non-Verbal Skill Area               | 46        | 7,5 months  |

Supplementary Table S1. **Developmental presurgical scale of patient #1 at 16 months.**

GMDS: Griffiths Mental Developmental Scales, DQ: Developmental Quotient, DA:

Developmental Age

| <b>WISC IV</b>             | <b>Index</b> |
|----------------------------|--------------|
| Full scale IQ              | <b>73</b>    |
| Verbal Comprehension Index | 92           |
| Perceptual Reasoning Index | 74           |
| Working Memory Index       | 67           |
| Processing Speed Index     | 82           |

Supplementary Table S2: Cognitive postsurgical evaluation of patient #1 at 10,5 years (9 years after surgery)

| GMDS                                | Pre-surgery      |                  | Post-surgery    |                 |
|-------------------------------------|------------------|------------------|-----------------|-----------------|
|                                     | <b>DQ (30 m)</b> | <b>DA (30 m)</b> | <b>DQ (61m)</b> | <b>DA (61m)</b> |
| General                             | <b>53</b>        | 16 m             | <b>53</b>       | 32 m            |
| Locomotor Area                      | 53               | 16 m             | 37              | 22,5 m          |
| Personal and Social Area            | 60               | 18 m             | 64              | 39 m            |
| Language Area                       | 43               | 13 m             | 59              | 36 m            |
| Manual and Visual Coordination Area | 57               | 17 m             | 43              | 26 m            |
| Non-Verbal Skill Area               | 51               | 15,5 m           | 61              | 37 m            |

Supplementary Table S3: Pre- and postsurgical GMDS of patient #2

| <b>GMDS</b>                         |       |      |      |      |
|-------------------------------------|-------|------|------|------|
| Chronological Age                   | 3,5 m | 15 m | 27 m | 48 m |
|                                     | DQ    | DQ   | DQ   | DQ   |
| Locomotor Area                      | 60    | 44   | 26   | 17   |
| Personal and Social Area            | 94    | 51   | 34   | 31   |
| Language Area                       | 31    | 53   | 35   | 17   |
| Manual and Visual Coordination Area | n.a.  | 43   | 26   | 21   |
| Non-Verbal Skill Area               | 57    | 36   | 24   | 35   |

Supplementary Table S4: Post-surgical GMDS of patient #4 at 3.5, 15, 27 and 48 months after surgery
